# Supplementary material for: Longer Brace Duration Is Associated with Lower Stress Levels and Better Quality of Life in Adolescents with Idiopathic Scoliosis
Source: MDPI journal article supplement (doi:10.3390/children10071120), 2023-06-28
Supplement: s1 [file s1]

# **BSSQ**

1. Pensi che l'apparenza del tuo corpo sia influenzata dal corsetto.

- ☐ Assolutamente d'accordo
- ☐ D'accordo
- ☐ In disaccordo
- ☐ Assolutamente in disaccordo

2. Mi pesa mostrarmi in pubblico indossando il corsetto.

- ☐ Assolutamente d'accordo
- ☐ D'accordo
- ☐ In disaccordo
- ☐ Assolutamente in disaccordo

3. Trovo spiacevoli le situazioni in cui gli altri possono vedere il mio corsetto.

- ☐ Assolutamente d'accordo
- ☐ D'accordo
- ☐ In disaccordo
- ☐ Assolutamente in disaccordo

4. Non mi interessa mostrare il corsetto.

- ☐ Assolutamente d'accordo
- ☐ D'accordo
- ☐ In disaccordo
- ☐ Assolutamente in disaccordo

5. Evito il contatto fisico in modo che le altre persone non si rendano conto che sto indossando il corsetto.

- ☐ Assolutamente d'accordo
- ☐ D'accordo
- ☐ In disaccordo
- ☐ Assolutamente in disaccordo

6. Quando scelgo i miei vestiti o porto i capelli lunghi, cerco di nascondere il corsetto.

- ☐ Assolutamente d'accordo
- ☐ D'accordo
- ☐ In disaccordo
- ☐ Assolutamente in disaccordo

7. Non mi importa mostrare il corsetto alle persone vicine (genitori, amici, compagni di scuola).

- ☐ Assolutamente d'accordo
- ☐ D'accordo
- ☐ In disaccordo
- ☐ Assolutamente in disaccordo

8. A causa del corsetto rinuncio alle attività ricreative e agli hobby che mi piacciono.

- ☐ Assolutamente d'accordo
- ☐ D'accordo
- ☐ In disaccordo
- ☐ Assolutamente in disaccordo
